# Supplementary material
Source: ML conference proceedings conference paper supplement (https://proceedings.mlr.press/v164/kim22b.html)
Supplement: Supplementary file 1 [file kim22b-supp.zip]

Archive with 1 entries (1 files):
- SCAPE_supplementary.pdf
